# Supplementary material for: Solvothermal synthesis of 1D nanostructured Mn2O3: effect of Ni2+ and Co2+ substitution on the catalytic activity of nanowires
Source: Royal Society of Chemistry journal article supplement (doi:10.1039/c5ra14618f), 2015-01-01
Supplement: c5ra14618f1.pdf [file c5ra14618f1.pdf]

# Solvothermal Synthesis of 1D Nanostructured Mn<sub>2</sub>O<sub>3</sub>: Effect of Ni<sup>2+</sup> and Co<sup>2+</sup> Substitution on the Catalytic Activity of Nanowires

Xiaoran Niu <sup>a</sup>, Huiying Wei <sup>a</sup>, Ke Tang<sup>a</sup>, Wei Liu <sup>a</sup>, Genyuan Zhao <sup>a</sup>, and Yanzhao Yang<sup>\*a</sup>

<sup>a</sup> Key Laboratory for Special Functional Aggregate Materials of Education Ministry, School of Chemistry and Chemical Engineering, Shandong University, Jinan, 250100, P. R. China. \*Corresponding author: yzhyang@sdu.edu.cn

**Table 1.** The surface areas and the compositional data of the as prepared Mn<sub>2</sub>O<sub>3</sub> samples.

| Samples                                   | Content (/ mol%)<br>M/ (M+Mn) | S <sub>BET</sub> <sup>a</sup> (m <sup>2</sup> g <sup>-1</sup> ) | Atom ratio <sup>b</sup> (%)<br>(M/(M+Mn)) |
|-------------------------------------------|-------------------------------|-----------------------------------------------------------------|-------------------------------------------|
| Mn <sub>2</sub> O <sub>3</sub>            | 0                             | 10.612                                                          | 0                                         |
| Ni-doped Mn <sub>2</sub> O <sub>3</sub>   | 5                             | 14.781                                                          | 1.34                                      |
| Co-doped Mn <sub>2</sub> O <sub>3</sub>   | 5                             | 13.875                                                          | 4.95                                      |
| Commercial Mn <sub>2</sub> O <sub>3</sub> | 0                             | 5.816                                                           | 0                                         |

M donated Ni or Co.

<sup>a</sup> The surface areas were calculated by the Brunauer–Emmett–Teller (BET) method..

<sup>b</sup> The atom ratio (M/(M+Mn)) data were detected by an inductively coupled plasma spectrometer (ICP-AES).

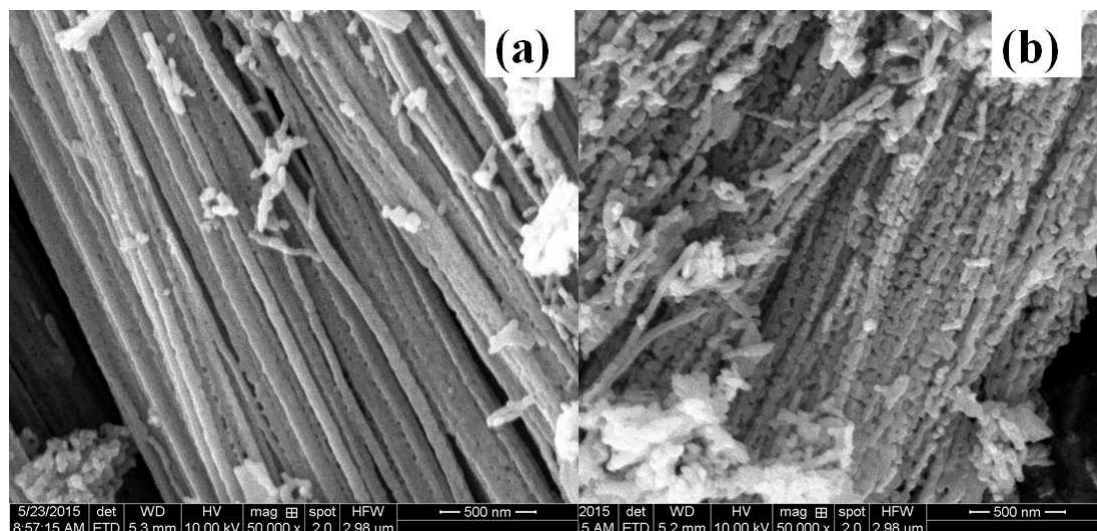

Figure S1. SEM of Ni-doped Mn<sub>2</sub>O<sub>3</sub> (a) and Co-doped Mn<sub>2</sub>O<sub>3</sub> (b) nanowires after catalysis for 6 times.

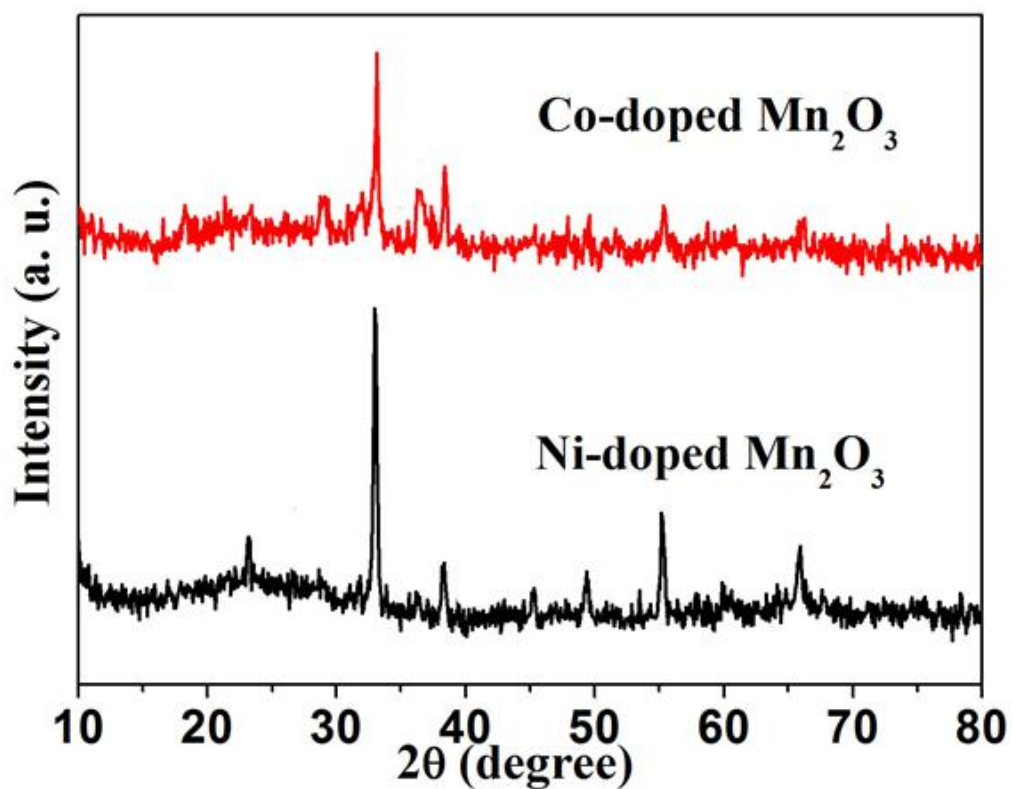

Figure S2. XRD patterns of Ni-doped and Co-doped samples after catalysis for 6 times.

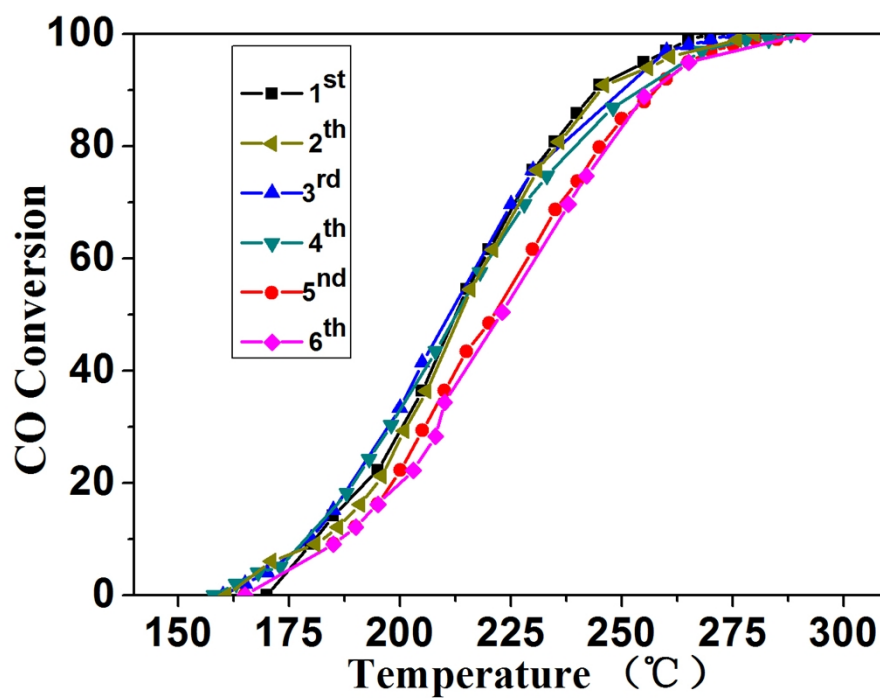

Figure S3 Catalytic performance of pure  $\text{Mn}_2\text{O}_3$  nanowires in different runs.
